# Supplementary material
Source: MDPI journal article supplement (https://www.mdpi.com/1424-2818/15/2/289)
Supplement: s1 [file s1]

## SUPPLEMENTARY MATERIAL

### Drying shapes aquatic fungal community assembly by reducing functional diversity

Rebeca Arias-Real<sup>1,2,3\*</sup>, Pilar Hurtado<sup>4,5,6</sup>, Giulia Gionchetta<sup>7</sup> and Cayetano Gutiérrez-Cánovas<sup>6</sup>

1 Centre of Molecular and Environmental Biology (CBMA), Department of Biology, University of Minho, Campus of Gualtar, 4710-057 Braga, Portugal; rebeca.arias.real@ub.edu.

2 Institute of Science and Innovation for Bio-Sustainability (IB-S), University of Minho, Campus of Gualtar, 4710-057 Braga, Portugal; rebeca.arias.real@ub.edu.

3 Department of Evolutionary Biology, Ecology and Environmental Sciences, Faculty of Biology, Univer-sitat de Barcelona, Av. Diagonal, 643 08028 Barcelona, Spain; rebeca.arias.real@ub.edu.

4 Department of Biogeography and Global Change, Museo Nacional de Ciencias Naturales (MNCN-CSIC), Madrid, Spain; phurtadoaragues@gmail.com

5 Università di Genova, Dipartimento di Farmacia, viale Cembrano, 4, 16148, Genova, Italy; phurta-doaragues@gmail.com

6 Área de Biodiversidad y Conservación, Universidad Rey Juan Carlos, C/Tulipán s/n, 28933 Móstoles, Madrid, Spain; phurtadoaragues@gmail.com; cayetano.gutierrez@urjc.es

7 Department of Surface Waters – Research and Management, Eawag, Swiss Federal Institute of Aquatic Science and Technology, Kastanienbaum, Switzerland; giulia.gionchetta@eawag.ch

\* Corresponding author. RA-R; E-mail: rebeca.arias.real@ub.edu

**Table S1. Geographical and basin characterization of the studied sites.** The percentage of land-use cover refers to a buffer area of 1 km around each sampling point.

| Site | Fungal richness | Drying | Altitude (m.a.s.l) | Order | Basin    | Prec. | Catch. | Land Use Cover (%) |        |      |
|------|-----------------|--------|--------------------|-------|----------|-------|--------|--------------------|--------|------|
|      |                 |        |                    |       |          |       |        | Urban              | Agric. | Nat. |
| 1    | 28              | 0      | 489                | 3     | Tordera  | 911   | 12.4   | 0                  | 0.2    | 99.8 |
| 2    | 29              | 0      | 655                | 4     | Tordera  | 875   | 49.1   | 0                  | 0      | 100  |
| 3    | 12              | 102    | 170                | 3     | Tordera  | 908   | 12.4   | 0.7                | 3.3    | 95.9 |
| 4    | 26              | 99     | 430                | 3     | Besós    | 788   | 6.5    | 2.2                | 0.8    | 97.0 |
| 5    | 15              | 70     | 100                | 3     | Muga     | 842   | 13.5   | 0                  | 99.5   | 0.5  |
| 6    | 25              | 0      | 385                | 3     | Ter      | 1038  | 9.1    | 0                  | 0.9    | 99.1 |
| 7    | 18              | 0      | 630                | 4     | Ter      | 953   | 30.9   | 1.4                | 0.03   | 98.5 |
| 8    | 16              | 257    | 526                | 3     | Ter      | 963   | 13.3   | 0                  | 0.6    | 99.4 |
| 9    | 13              | 30     | 140                | 3     | Ter      | 816   | 7.7    | 0                  | 78.5   | 21.5 |
| 10   | 28              | 0      | 605                | 4     | Frankolí | 470   | 28.9   | 0                  | 14.1   | 85.9 |
| 11   | 20              | 36     | 330                | 4     | Foix     | 590   | 26.8   | 0                  | 100    | 0    |
| 12   | 18              | 245    | 475                | 4     | Fluviá   | 475   | 965.4  | 0                  | 2.3    | 97.7 |
| 13   | 20              | 28     | 219                | 4     | Fluviá   | 998   | 13.7   | 0                  | 34.4   | 65.6 |
| 14   | 16              | 159    | 484                | 4     | Fluviá   | 1026  | 15.7   | 0                  | 1.1    | 49.3 |

|                                                                                                                                                                                                                                        |    |     |     |   |           |     |      |     |     |      |
|----------------------------------------------------------------------------------------------------------------------------------------------------------------------------------------------------------------------------------------|----|-----|-----|---|-----------|-----|------|-----|-----|------|
| 15                                                                                                                                                                                                                                     | 13 | 340 | 325 | 3 | Llobregat | 732 | 10.9 | 2.1 | 0.9 | 96.9 |
| Prec. = annual precipitation (mm); Catch. = catchment area (Km <sup>2</sup> ); Agric. = extensive agriculture; Nat. = nature that include: forest (broad-leaved forest. mixed forest and coniferous forest), scrubland and grasslands. |    |     |     |   |           |     |      |     |     |      |

**Table S2.** Pearson correlation coefficients between functional space PCoA axes and original trait categories. Correlation coefficients  $r \geq |0.50|$  are in bold.

|                       | A1           | A2           | A3          | A4          | A5           | A6          | A7          |
|-----------------------|--------------|--------------|-------------|-------------|--------------|-------------|-------------|
| Litter saprotrophic   | <b>0.54</b>  | <b>-0.75</b> | -0.2        | -0.04       | 0.05         | 0.12        | 0.1         |
| Wood saprotrophic     | -0.27        | 0.18         | 0.47        | 0.12        | 0.07         | <b>0.58</b> | -0.19       |
| Plant pathogen        | <b>-0.6</b>  | <b>0.5</b>   | -0.13       | -0.08       | -0.23        | -0.46       | 0.04        |
| Mycoparasite          | 0.06         | 0.09         | 0.05        | -0.19       | -0.01        | -0.04       | -0.09       |
| Litter                | 0.35         | -0.49        | -0.39       | -0.11       | -0.1         | -0.3        | 0.13        |
| Root                  | -0.37        | 0.1          | 0.3         | -0.03       | 0.14         | 0.37        | -0.2        |
| Wood                  | 0.14         | 0.21         | 0.6         | 0.2         | -0.04        | 0.18        | 0.2         |
| Non aquatic           | -0.11        | -0.19        | 0.13        | <b>0.82</b> | 0.38         | -0.23       | 0.06        |
| aquatic               | -0.09        | -0.03        | -0.12       | -0.4        | 0.14         | 0.25        | 0.46        |
| Treeholes             | 0.22         | -0.19        | 0.48        | 0.31        | <b>-0.71</b> | -0.07       | 0.11        |
| Endophyte capacity    | <b>-0.88</b> | -0.43        | 0.06        | -0.06       | 0.06         | 0.03        | -0.06       |
| No endophyte capacity | 0.09         | 0.13         | -0.22       | 0.14        | -0.05        | -0.03       | -0.22       |
| Branched              | 0.42         | -0.25        | <b>0.67</b> | -0.33       | 0.23         | -0.11       | -0.18       |
| Tetrradiate           | -0.02        | -0.3         | 0           | 0.13        | -0.03        | 0.13        | <b>0.79</b> |
| Filiform              | -0.28        | 0.41         | 0.17        | 0.04        | 0.18         | 0.23        | 0.08        |
| Sigmoid               | -0.38        | 0.44         | -0.08       | 0.1         | 0.03         | -0.41       | 0.15        |
| Compact               | -0.24        | 0.1          | 0.05        | -0.14       | -0.09        | 0.1         | -0.07       |
| Ascospores            | -0.39        | 0.07         | -0.11       | -0.3        | -0.29        | -0.15       | -0.04       |
| Clove-shaped          | -0.21        | -0.11        | -0.03       | -0.2        | -0.1         | 0.29        | -0.06       |
